# Supplementary material
Source: MDPI journal article supplement (https://www.mdpi.com/2071-1050/14/18/11402)
Supplement: s1 [file s1]

# PuriStar<sup>®</sup> R3-12

## CuO/ZnO Tablets

**BASF PuriStar<sup>®</sup> R3-12 is a high-performance material, widely used for removal of Arsine, Phosphine and reactive Sulfur from Propylene containing streams.**

BASF PuriStar<sup>®</sup> R3-12 comes in tablet form with a nominal diameter of 5 mm and height of 3 mm (approx. 3/16" x 1/8"). Alternatively, it can be produced in smaller 3 x 3 mm tablets.

### Product Applications

Due to its high surface area and ultrafine copper crystallite size, PuriStar<sup>®</sup> R3-12 excels in the removal of arsine, phosphine, H<sub>2</sub>S and COS from process and product streams. It is widely used in the purification of refinery, chemical, and polymer grades of propylene. Typical applications include purification of propylene at the front end of cumene, Oxo-C4 and polypropylene units.

R3-12 can also be used as a guard bed to protect noble metal catalysts (e.g. MAPD hydrogenation catalysts), against poisoning by arsine and sulfur.

Depending on the process, PuriStar<sup>®</sup> R3-12 can be used at temperatures up to 250°C (480°F).

Besides R3-12, BASF offers an improved version of the material under the trade name PuriStar<sup>®</sup> R3-22. Please contact BASF for more details.

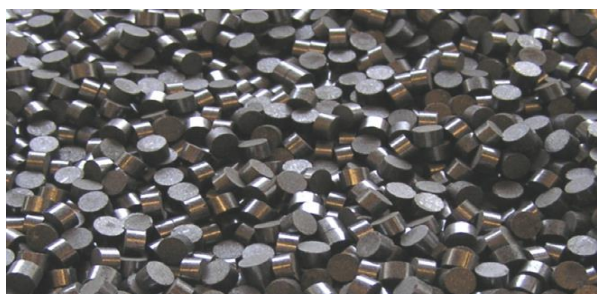

Before using the material, a drying step is required. This can either be done via a special operation or on-stream. Alternatively, BASF can also offer a pre-dried version of the material. Please contact BASF for further details.

### Typical Properties

#### Chemical

|                 |             |
|-----------------|-------------|
| Main Components | CuO and ZnO |
|-----------------|-------------|

|         |                       |
|---------|-----------------------|
| Balance | Alumina and Promoters |
|---------|-----------------------|

#### Physical

|                |                                    |
|----------------|------------------------------------|
| Crush Strength | Approx. 7.0 kg (15 lbs), side wall |
|----------------|------------------------------------|

~ 1250 kg/m<sup>3</sup> (78 lbs/ft<sup>3</sup>),

tapped

|              |                                                    |
|--------------|----------------------------------------------------|
| Bulk Density | ~ 1150 kg/m <sup>3</sup> (72 lbs/ft <sup>3</sup> ) |
|--------------|----------------------------------------------------|

~ 1150 kg/m<sup>3</sup> (72 lbs/ft<sup>3</sup>)

sock loaded

### Packaging (Typical)

- 980 kg net (2160 lbs) in 1150 liter super sacks (IBC flexible)
- 140 kg net (308.6 lbs) in 120 liter steel drums

### Shipping Point (as is and pre-dried)

- Ludwigshafen, Germany
- Shanghai, P.R. China

## About Us

BASF's Catalysts division is the world's leading supplier of environmental and process catalysts. The group offers exceptional expertise in the development of technologies that protect the air we breathe, produce the fuels that power our world and ensure efficient production of a wide variety of chemicals, plastics and other products, including advanced battery materials. By leveraging our industry-leading R&D platforms, passion for innovation and deep knowledge of precious and base metals, BASF's Catalysts division develops unique, proprietary solutions that drive customer success.

**BASF - We create chemistry**

### Americas

BASF Corporation  
25 Middlesex/Essex Turnpike  
Iselin, New Jersey, 08830, USA  
Tel : +1-732-205-5000  
Fax: +1-732-205-7725  
Email: [catalysts-america@basf.com](mailto:catalysts-america@basf.com)

### Asia Pacific

BASF (China) Company Limited  
300 Jiang Xin Sha Road,  
Pudong, Shanghai 200137  
P.R. China  
Tel: +86-21-2039 2549  
Fax: +86-21-2039 4800-2549  
Email: [catalysts-asia@basf.com](mailto:catalysts-asia@basf.com)

### Europe, Middle East, Africa

BASF De Meern BV Catalysts  
The Netherlands  
Tel: +31-30-666 9437  
Email: [catalysts-europe@basf.com](mailto:catalysts-europe@basf.com)

*PuriStar* is a trademark of BASF.

Although all statements and information in this publication are believed to be accurate and reliable, they are presented gratis and for guidance only, and risks and liability for results obtained by use of the products or application of the suggestions described are assumed by the user. NO WARRANTIES OF ANY KIND, EITHER EXPRESS OR IMPLIED, INCLUDING WARRANTIES OF MERCHANTABILITY OR FITNESS FOR A PARTICULAR PURPOSE, ARE MADE REGARDING PRODUCTS DESCRIBED OR DESIGNS, DATA OR INFORMATION SET FORTH. Statements or suggestions concerning possible use of the products are made without representation or warranty that any such use is free of patent infringement and are not recommendations to infringe any patent. The user should not assume that toxicity data and safety measures are indicated or that other measures may not be required. © 2015 BASF
